# Supplementary material for: Anaerobic gut bacterial metabolites alter morphology and survival of neurons and glia in a hippocampal culture model of Parkinson’s Disease
Source: Research Square preprint supplement (doi:10.21203/rs.3.rs-8852210/v1), 2026-02-23
Supplement: Supplementary file 1 [file e52fceaf5e87d506ffbcbbc3.docx]

| **Cell Type** | **Neuron** | | | | | | | **Microglia** | | | | | | | | | **Astrocyte** | | | |
| --- | --- | --- | --- | --- | --- | --- | --- | --- | --- | --- | --- | --- | --- | --- | --- | --- | --- | --- | --- | --- |
| **Factor:🡪**  **Effect of:** | **C**ell **Count** | **Branch Count†** | **%MAP2†** | | **Area†** | | **Perimeter†** | **Cell Count** | | | **%IBA1†** | | **Area†** | **Perimeter†** | **Eccentricity†** | | **Cell Count** | **%GFAP†** | **Area†** | **Perimeter†** |
| α-syn (YCFA) | **↓$$$$**  **↓*** |  |  | | **- C↑** | | **- C↑** | **↓$$$$**  **↓***** | | | **↑****  **- C↑** | | **↑*****  **- C↑** | **↑*****  **- C↑** | **↑#**  **- C↑** | | **↓$$$$** | **- C↑** | **↑*** | **(↑ p=0.06)** |
| α-syn (BHI) | **(↓**  **p=0.07)** |  |  | |  | |  | **↓*** | | |  | | **(↑ p=0.06)** |  |  | | **(↓**  **p=0.1)** |  | **↑*** | **↑*** |
| *A. muciniphila* |  |  |  | |  | | **↓*** | **↑*** | | | **↓#** | |  |  |  | | **(#* p=0.07)** |  |  |  |
| [*A. muciniphila*+α-syn] vs α-syn |  |  |  | |  | |  |  | | |  | |  |  |  | |  | **↓#** | **↓*** |  |
| [*A. muciniphila*+α-syn] vs *A. muciniphila* |  |  |  | |  | |  | **↓****** | | | **↑##** | | **↑*** | **↑***** |  | | **↓*** |  |  |  |
| *A. shahii* | **↑*** |  |  | |  | | **↓##** |  | | |  | |  |  | **↑*** | |  |  |  |  |
| [*A. shahii*+α-syn]  vs α-syn |  |  |  | |  | |  |  | | |  | |  |  |  | |  |  |  | **↑*** |
| [*A. shahii*+ α-syn]  vs A. shahii | **↓**** |  |  | |  | | **↓#** | **↓**** | | | **↑*** | | **↑*** | **↑*** | **↑#** | | **↓*** |  | **↑*** | **↑**** |
| *B. subtilis* |  |  |  | |  | |  | **↑*** | | |  | |  |  |  | |  |  |  | **↓#** |
| [*B. subtilis*+α-syn]  vs α-syn | **↑*** |  | **↓*** | |  | | **↓*** |  | | |  | |  |  |  | |  |  |  |  |
| [*B. subtilis*+α-syn  vs *B. subtilis* |  |  |  | |  | |  | **↓****** | | | **↑*** | | **↑***** | **↑***** |  | | **↓*** |  |  | **↑#** |
| *B. coprocola* | **↑**** | **↓##** |  | |  | | **↓#** | **↑***** | | |  | |  |  | **↑#** | |  |  |  |  |
| [*B. coprocola*+α-syn]  vs α-syn |  |  |  | |  | |  |  | | |  | |  |  |  | |  |  |  |  |
| [*B. coprocola*+α-syn]  vs *B. coprocola* | **↓**** |  |  | |  | |  | **↓****** | | | **↑*** | | **↑***** | **↑***** | **↑#** | | **↓**** |  | **↑*** |  |
| *B. hansenii* | **↑***** |  |  |  | | | **↓*** | **↑*** | |  | |  | |  | |  |  |  |  |  |
| [*B. hansenii*+α-syn] vs α-syn |  |  | **↓**** | **↓##** | | | **↓**** |  | |  | |  | |  | |  |  |  |  |  |
| [*B. hansenii*+α-syn]  vs *B. hansenii* | **↓***** |  |  |  | |  | | **↓****** |  | | | **↑**** | | **↑**** | | **↑#** | **↓**** |  |  |  |
| *C. aerofaciens* |  |  |  |  | |  | |  |  | | |  | |  | |  |  |  |  |  |
| [*C. aerofaciens*+α-syn] vs α-syn |  |  |  |  | |  | |  |  | | |  | |  | |  |  |  |  |  |
| [*C. aerofaciens*+α-syn] vs *C. aerofaciens* | **↓***** |  |  |  | |  | | **↓****** | **↑**** | | | **↑**** | | **↑**** | |  |  |  |  | **↑*** |
| *E. coli* |  |  |  |  | | **↓##** | |  |  | | |  | |  | |  |  |  |  |  |
| [*E. coli*+α-syn]  vs +α-syn |  |  | **↓#** |  | |  | |  |  | | |  | |  | |  |  |  |  |  |
| [*E. coli* +α-syn]  vs *E. coli* | **↓**** |  |  |  | |  | | **↓***** | **↑**** | | | **↑**** | | **↑**** | |  | **↓*** |  | **↑*** |  |
| *E. rectale* |  | **↓*** |  |  | |  | | **↑*** |  | | |  | |  | | **↑#** |  |  |  |  |
| [*E. rectale*+α-syn]  vs α-syn |  |  |  |  | |  | |  |  | | |  | | **↓*** | |  |  |  |  |  |
| [*E. rectale+*α-syn]  vs *E. rectale* | **↓*** |  |  |  | |  | | **↓****** | **↑**** | | | **↑*** | | **↑*** | | **↑#** |  |  |  | **↑#** |
| *R. intestinalis* |  |  |  |  | |  | |  |  | | |  | |  | |  |  |  |  |  |
| [*R. intestinalis*+α-syn] vs α-syn |  |  |  |  | |  | |  |  | | |  | |  | |  |  |  |  | **↓*** |
| [*R. intestinalis*+α-syn]  vs *R. intestinalis* | **↓*** |  |  |  | |  | | **↓***** |  | | | **↑*** | | **↑*** | | **↑#** | **↓*** |  |  |  |
| Table 3. Summary of key parameters across all cell types per bacterial supernatant against control with or without the presence of hA53T-αsyn. *Abbreviations:* α-syn: hA53T-αsyn transfected cells. ‘↑’ significantly increased, and ‘↓’ significantly decreased. Significances were calculated using one-way ANOVAs and Sidak’s post hoc test (denoted by *). Planned post hoc comparison using unpaired t-tests (if ANOVA was significant) are indicated by ‘#’, or for pooled data (Fig. 5) as $. – C: negative correlation with count, i.e. remaining cells were larger. Significances denote *p <* 0.05 (* or #); *p <* 0.01 (** or ##), *p <* 0.001 (***), and *p <* 0.0001 (****). Data for ‘Solidity’ was excluded as there were no significant effects. Empty cells denote no significance. †: parameters calculated as mean per cell. Green font: assumed beneficial, Red font: assumed detrimental., e.g. an increase in GFAP or Iba1 staining (especially alongside higher cell numbers) is assumed detrimental. In post-mitotic non-proliferating neurones, a reduction in size is assumed to be indicative of degenerative processes, i.e. detrimental. Blue font: rises in MAP2 levels can indicate reduced neuronal health. Since hA53T-αsyn did not reliably enhance MAP2 levels, reductions caused by SNs cannot be unequivocally categorised as beneficial. Note: changes in size parameters have been considered in the context of changes in cell numbers, with e.g. less but larger glia cells are considered a sign of harm. Data not shown in the main text nut summarised here can be found in Supplementary Figures 1 – 14. | | | | | | | | | | | | | | | | | | | | |
